# Supplementary material for: Longitudinal Association between Uric Acid and Incident Sarcopenia
Source: MDPI journal article supplement (doi:10.3390/nu15143097), 2023-07-11
Supplement: s1 [file s1]

**Table S1.** Baseline characteristics of included and excluded participants in this study.

|                                | <b>Total</b>   | <b>Included</b> | <b>Excluded</b> |
|--------------------------------|----------------|-----------------|-----------------|
| N                              | 17708          | 5086            | 12622           |
| Uric acid, mg/dl               | 4.46 ± 1.26    | 4.43 ± 1.23     | 4.48 ± 1.29     |
| Demographic                    |                |                 |                 |
| Age, years                     | 59.05 ± 10.15  | 58.36 ± 8.34    | 59.33 ± 10.78   |
| Residence                      |                |                 |                 |
| Urban                          | 4564 (25.83)   | 842 (16.61)     | 3772 (29.54)    |
| Rural                          | 13105 (74.17)  | 4227 (83.39)    | 8878 (70.46)    |
| Education level                |                |                 |                 |
| Primary school or below        | 11755 (66.38)  | 3534 (69.48)    | 8221 (66.38)    |
| Middle school                  | 3652 (20.62)   | 1059 (20.82)    | 3652 (20.62)    |
| High school or above           | 2301 (12.99)   | 493 (9.69)      | 1808 (14.32)    |
| Marital status                 |                |                 |                 |
| Married and living with spouse | 14170 (80.17)  | 4407 (86.65)    | 9763 (77.55)    |
| Others                         | 3505 (19.83)   | 679 (13.35)     | 2826 (22.45)    |
| Health behavior                |                |                 |                 |
| Drinking                       |                |                 |                 |
| Yes                            | 5767 (32.87)   | 1663 (32.74)    | 4104 (32.93)    |
| No                             | 11776 (67.13)  | 3417 (67.26)    | 8359 (67.07)    |
| Smoking                        |                |                 |                 |
| Yes                            | 4862 (28.76)   | 1516 (29.88)    | 3346 (28.27)    |
| No                             | 12045 (71.24)  | 3557 (70.12)    | 8488 (71.73)    |
| Sleep duration, h              | 6.37 ± 1.89    | 6.37 ± 1.82     | 6.37 ± 1.93     |
| Chronic diseases               |                |                 |                 |
| Diabetes Mellitus              | 2115 (12.04)   | 750 (14.75)     | 1365 (10.94)    |
| Hypertension                   | 9369 (53.34)   | 2049 (40.29)    | 7320 (58.66)    |
| Depression                     | 5239 (29.59)   | 1623 (31.91)    | 3616 (28.65)    |
| Dyslipidemia                   | 3646 (20.59)   | 1406 (27.64)    | 2240 (17.75)    |
| Pulmonary disease              | 1781 (10.18)   | 493 (9.74)      | 1288 (10.36)    |
| Kidney disease                 | 1106 (6.34)    | 349 (6.91)      | 757 (6.10)      |
| Cardiovascular disease         | 2093 (11.98)   | 586 (11.59)     | 1507 (12.14)    |
| Arthritis                      | 5773 (32.94)   | 1788 (35.24)    | 3985 (32.01)    |
| Biochemical parameters         |                |                 |                 |
| Creatinine, mg/dl              | 0.78 ± 0.23    | 0.77 ± 0.18     | 0.78 ± 0.27     |
| eGFR, ml/(min×1.73 m2)         | 108.22 ± 29.76 | 108.37 ± 28.73  | 108.11 ± 30.54  |
| HDL, mg/dl                     | 50.84 ± 15.32  | 50.64 ± 15.07   | 50.99 ± 15.52   |
| LDL, mg/dl                     | 115.99 ± 34.91 | 117.19 ± 34.80  | 115.06 ± 34.96  |
| CRP, mg/L                      | 2.80 ± 7.63    | 2.43 ± 6.60     | 3.08 ± 8.32     |

Continuous variables are presented as the mean ± standard deviation, and categorical variables are expressed as numbers (percentages).

Abbreviations: eGFR, estimated glomerular filtration rate; HDL-C, high-density lipoprotein cholesterol; LDL-C, low-density lipoprotein cholesterol; CRP, high sensitivity C-reactive protein; SMI, skeletal muscle mass index.

**Table S2.** Hazard ratios and 95% confidence intervals for incident sarcopenia according to the sex-specific quartiles of uric acid and uric acid as a continuous variable after excluding participants with hyperuricemia. (n=4819)

| Outcome                 | Cases | Incidence rate, per 1000 person-years | Model 4          | P-value |
|-------------------------|-------|---------------------------------------|------------------|---------|
| Males                   |       |                                       |                  |         |
| Continuous variable     |       |                                       |                  |         |
| (UA per 1 mg/dl)        | 349   | 42.66                                 | 0.82 (0.73-0.93) | 0.002   |
| UA Quartiles            |       |                                       |                  |         |
| Q1 ( $\leq 4.06$ mg/dl) | 127   | 60.13                                 | 1                |         |
| Q2 (4.06-4.81mg/dl)     | 96    | 44.24                                 | 0.80 (0.61-1.06) | 0.124   |
| Q3 (4.81-5.67mg/dl)     | 84    | 38.18                                 | 0.73 (0.54-0.98) | 0.037   |
| Q4 ( $\geq 5.67$ mg/dl) | 42    | 24.74                                 | 0.52 (0.35-0.75) | 0.001   |
| Females                 |       |                                       |                  |         |
| Continuous variable     |       |                                       |                  |         |
| (UA per 1 mg/dl)        | 171   | 16.82                                 | 0.92 (0.75-1.12) | 0.44    |
| UA Quartiles            |       |                                       |                  |         |
| Q1 ( $\leq 3.29$ mg/dl) | 46    | 17.26                                 | 1                |         |
| Q2 (3.29-3.87mg/dl)     | 49    | 18.46                                 | 1.01 (0.66-1.55) | 0.936   |
| Q3 (3.87-4.57mg/dl)     | 44    | 16.48                                 | 0.98 (0.62-1.54) | 0.955   |
| Q4 ( $\geq 4.57$ mg/dl) | 32    | 14.68                                 | 0.92 (0.56-1.53) | 0.761   |

Data are presented as HRs (95% CIs).

Model 4: adjusted age, residence, educational level, marital status, drinking status, smoking status, nighttime sleep duration, DM, hypertension, depression, dyslipidemia, pulmonary disease, kidney disease, cardiovascular disease, arthritis, eGFR, CRP, HDL-C and LDL-C.

Abbreviations: HRs, hazards ratios; CIs, confidence intervals; DM, diabetes mellitus; eGFR, estimated glomerular filtration rate; HDL-C, high-density lipoprotein cholesterol; LDL-C, low-density lipoprotein cholesterol; CRP, high sensitivity C-reactive protein.

**Table S3.** Hazard ratios and 95% confidence intervals for incident sarcopenia according to the sex-specific quartiles of uric acid and uric acid as a continuous variable after excluding participants with eGFR≤ 60 ml/min per 1.73 m<sup>2</sup>. (n=5007)

| Outcome             | Cases | Incidence rate, per 1000<br>person-years | Model 4          | P-value |
|---------------------|-------|------------------------------------------|------------------|---------|
| Males               |       |                                          |                  |         |
| Continuous variable |       |                                          |                  |         |
| (UA per 1 mg/dl)    | 364   | 42.68                                    | 0.90 (0.81-0.99) | 0.047   |
| UA Quartiles        |       |                                          |                  |         |
| Q1 (≤4.06mg/dl)     | 126   | 59.82                                    | 1                |         |
| Q2 (4.06-4.81mg/dl) | 95    | 43.98                                    | 0.79 (0.60-1.05) | 0.111   |
| Q3 (4.81-5.67mg/dl) | 81    | 37.39                                    | 0.71 (0.53-0.96) | 0.028   |
| Q4 (≥5.67mg/dl)     | 62    | 29.59                                    | 0.62 (0.44-0.87) | 0.006   |
| Females             |       |                                          |                  |         |
| Continuous variable |       |                                          |                  |         |
| (UA per 1 mg/dl)    | 182   | 17.29                                    | 1.05 (0.89-1.24) | 0.553   |
| UA Quartiles        |       |                                          |                  |         |
| Q1 (≤3.29mg/dl)     | 46    | 17.29                                    | 1                |         |
| Q2 (3.29-3.87mg/dl) | 49    | 18.49                                    | 1.01 (0.66-1.54) | 0.946   |
| Q3 (3.87-4.57mg/dl) | 44    | 16.53                                    | 0.98 (0.62-1.54) | 0.945   |
| Q4 (≥4.57mg/dl)     | 43    | 16.86                                    | 1.08 (0.67-1.74) | 0.741   |

Data are presented as HRs (95% CIs).

Model 4: adjusted age, residence, educational level, marital status, drinking status, smoking status, nighttime sleep duration, DM, hypertension, depression, dyslipidemia, pulmonary disease, kidney disease, cardiovascular disease, arthritis, eGFR, CRP, HDL-C and LDL-C.

Abbreviations: HRs, hazards ratios; CIs, confidence intervals; DM, diabetes mellitus; eGFR, estimated glomerular filtration rate; HDL-C, high-density lipoprotein cholesterol; LDL-C, low-density lipoprotein cholesterol; CRP, high sensitivity C-reactive protein.
